# Supplementary material for: Modulating the Electrical and Mechanical Microenvironment to Guide Neuronal Stem Cell Differentiation
Source: PubMed Central journal article supplement (PMC8025039; doi:10.1002/advs.202002112), 2021-02-18
Supplement: ADVS-8-2002112-s001.pdf [file ADVS-8-2002112-s001.pdf]

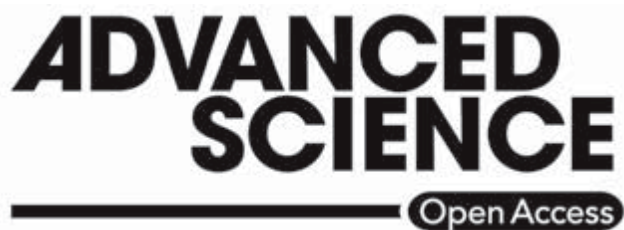

## Supporting Information

for *Adv. Sci.*, DOI: 10.1002/adv.202002112

### Modulating the Electrical and Mechanical Microenvironment to Guide Neuronal Stem Cell Differentiation

*Dr. Byeongtaek Oh<sup>1</sup>, Dr. Yu-Wei Wu<sup>2,3</sup>, Vishal Swaminathan<sup>1</sup>, Vivek Lam<sup>1</sup>, Prof. Jun Ding<sup>1,2\*</sup>, Prof. Paul M. George<sup>1\*</sup>*

## SUPPLEMENTARY INFORMATION

| Type of Scaffold  | E (kPa)         | $\rho$ (S/m)    | Proportion of Tuj1+ Cells (%) |                 |
|-------------------|-----------------|-----------------|-------------------------------|-----------------|
|                   |                 |                 | (-) Stimulation               | (+) Stimulation |
| Glass             |                 |                 | 9.3 $\pm$ 4.5                 | N/A             |
| CGS (without CNF) | 9.64 $\pm$ 0.25 | 0.2 $\pm$ 0.01  | 8.1 $\pm$ 1.3                 | 12.5 $\pm$ 2.6  |
| CGS (1:10)        | 8.69 $\pm$ 0.56 | 0.21 $\pm$ 0.01 | 12.6 $\pm$ 3.4                | 19.7 $\pm$ 8.5  |
| CGS (1:2)         | 6.10 $\pm$ 0.7  | 0.22 $\pm$ 0.03 | 18.8 $\pm$ 3.9                | 41.8 $\pm$ 15.6 |
| CGS (1:1)         | 3.11 $\pm$ 0.6  | 0.21 $\pm$ 0.02 | 39.2 $\pm$ 6.8                | 75.9 $\pm$ 3.4  |

**Table S1. Characterization of CGS substrates.**

Proportion of Tuj1-positive cells in culture on varying substrates with electrical stimulation ( $\pm$ 800 mV, 100 Hz for 1 hr). Data are presented as Mean $\pm$ S.D. (n=4). *E* indicates matrix stiffness;  $\rho$  indicates electrical conductivity.

| Category                           | Targeted Cells     | INH                        | GFs           | E (kPa)  | ST                     | Neuron (%) | Days | REF  |
|------------------------------------|--------------------|----------------------------|---------------|----------|------------------------|------------|------|------|
| Inhibitors                         | Cortical Neurons   | DOR and SB                 | None          | TC       | NA                     | ≥70%       | 70 d | [1]  |
| Mechanical cues<br>Trophic Factors | Motor Neurons      | L+SB<br>(Initial 7d)       | BDNF IGF      | ≤5 kPa   | NA                     | 17 %       | 23 d | [18] |
| Mechanical cues                    | Neurons            | NA                         | None          | ≤0.3 kPa | NA                     | ≥80 %      | 19 d | [14] |
| 3D Organoid Culture                | Neurons            | DOR+SB<br>(Initial 7d)     | BDNF,<br>NT3  | NA       | NA                     | ≥80 %      | 49 d | [5]  |
| Trophic Factor Inhibitor           | Neurons            | DOR and SB                 | BDNF,<br>GDNF | TC       | NA                     | ≥70%       | 70 d | [13] |
| Trophic Factor Inhibitor           | Cortical Neurons   | L+SB+P/S/D                 | BDNF          | TC       | NA                     | ≥70%       | 13 d | [4]  |
| Trophic Factor Inhibitor           | Motor Neurons      | L+SB+P/S/D                 | BDNF<br>GDNF  | TC       | NA                     | ≥70%       | 14 d | [6]  |
| Viral infection                    | Excitatory Neurons | NA                         | BDNF<br>NT3   | TC       | NA                     | ≥90%       | 14 d | [7]  |
| Mechanical and Electrical cues     | Cortical Neurons   | DOR and SB<br>(Initial 7d) | None          | ≤3 kPa   | Electrical stimulation | ≥80 %      | 14 d | CS   |

**Table S2. Summary and comparison of neural differentiation efficacy to previously published studies.**

INH: Inhibitors (DOR: Dorsomorphin, SB: SB431542, L: LDN193189, P/S/D: PD0325901, SU5402, DAPT cocktail), GFs: growth factors (BDNF: brain-derived neurotrophic factor, IGF: insulin-like growth factor, GDNF: glial cell -derived neurotrophic factor, and NT3: Neurotrophin-3), E: Matrix stiffness, ST: Stimulation and REF: Reference. NA indicates not applied. CS: Current study.

| REAGENT or RESOURCE                                   | SOURCE             | IDENTIFIER    |
|-------------------------------------------------------|--------------------|---------------|
| <b>Antibodies</b>                                     |                    |               |
| Mouse anti-TUJ1                                       | Neuromics          | MO15013       |
| Chicken anti-MAP2                                     | Invitrogen         | PA-11671      |
| Rabbit anti-TBR1                                      | Abcam              | AB31940       |
| Rabbit anti-CTIP2                                     | Abcam              | AB28448       |
| Mouse anti-SATB2                                      | Abcam              | AB51502       |
| Rabbit anti-GFAP                                      | EMD Millipore      | AB5804        |
| Rabbit anti-RhoA                                      | Invitrogen         | OSR00266W     |
| Mouse anti-YAP                                        | Santa Cruz Biotech | SC 101199     |
| Rabbit anti-p-SMAD                                    | EMD Millipore      | AB3848-I      |
| Rabbit anti-Ki67                                      | Invitrogen         | PA-121520     |
| Mouse anti-Nestin                                     | Invitrogen         | MA-1110       |
| Rabbit anti-CNTF                                      | Novus Biologicals  | NBP183277     |
| Rabbit anti-Oct4                                      | Invitrogen         | 701756        |
| Mouse anti-SSEA4                                      | Invitrogen         | MA1021        |
| Mouse anti-GAPDH                                      | Novus Biologicals  | NBP2-37828    |
| Alexa Flour 488 Goat anti-rabbit                      | Thermo Scientific  | A11034        |
| Alexa Flour 488 Goat anti-mouse                       | Thermo Scientific  | A32732        |
| Alexa Flour 568 Goat anti-rabbit                      | Thermo Scientific  | A11036        |
| Alexa Flour 568 Goat anti-chicken                     | Thermo Scientific  | A11041        |
| Alexa Flour 568 Goat anti-mouse                       | Thermo Scientific  | A11004        |
| Alexa Flour 647 Goat anti-chicken                     | Thermo Scientific  | A21449        |
| Alexa Flour 647 Goat anti-rabbit                      | Thermo Scientific  | A32733        |
| IRDye® 800CW Goat anti-Mouse                          | LI-COR             | P/N 925-32210 |
| IRDye® 680LT Goat anti-Rabbit                         | LI-COR             | P/N 925-32210 |
| <b>Biological Samples</b>                             |                    |               |
| Bovine serum albumin (BSA)                            | Fisher BioReagents | BP9706100     |
| Normal goat serum (NGS)                               | Invitrogen         | 31873         |
| CNTF shRNA Lentiviral particles                       | Santa Cruz Biotech | SC-41921-V    |
| Control shRNA Lentiviral particles                    | Santa Cruz Biotech | SC-108080     |
| GFP Control Lentiviral particles                      | Santa Cruz Biotech | SC-108084     |
| <b>Chemicals, inhibitors, and Recombinant Protein</b> |                    |               |
| Graphite                                              | Ashbury carbon     | Micro890      |
| Carbon nanofiber                                      | Sigma Aldrich      | 719781        |
| Sulfuric acid                                         | Fisher Chemical    | A510-P212     |
| Phosphoric acid                                       | Fisher Chemical    | A242-1        |
| Ascorbic acid                                         | Fisher Chemical    | A61-100       |
| Sodium iodide                                         | Fisher Chemical    | S324-100      |
| Hydrogen peroxide solution (30 wt%)                   | Acros Organics     | AC411885000   |
| Thiazovivin                                           | Selleck Chemical   | 50-753-2      |
| Recombinant Human CNTF                                | Peprotech          | 450-13        |
| DMEM/F-12 Medium                                      | Gibco              | 11330057      |
| Neurobasal Medium                                     | Gibco              | 21103049      |
| B27 Supplement                                        | Gibco              | 17504044      |
| N2 MAX Supplement                                     | R&D system         | AR009         |
| Non-essential amino acid                              | GE Healthcare      | SH30238.01    |
| GlutaMAX                                              | Gibco              | 35050061      |
| GFR membrane matrix                                   | Corning            | 354230        |
| Poly-L-ornithine hydrobromide                         | Sigma Aldrich      | P3655         |
| Laminin                                               | Sigma Aldrich      | L2020         |
| Penicillin-Streptomycin                               | Gibco              | 15140122      |
| Dorsomorphin                                          | Apexbio            | 50-101-3624   |

|                                      |             |               |
|--------------------------------------|-------------|---------------|
| SB431542                             | Apexbio     | 50-101-2514   |
| <b>Taqman Gene Expression Probes</b> |             |               |
| <i>GAPDH</i>                         |             | Hs02758991_g1 |
| <i>Tubb3</i>                         |             | Hs00801390_s1 |
| <i>Map2</i>                          |             | Hs00258900_m1 |
| <i>GFAP</i>                          |             | Hs00909233_m1 |
| <i>Nes</i>                           |             | Hs04187831_g1 |
| <i>Rhoa</i>                          |             | Hs00357608_m1 |
| <i>Syn1</i>                          |             | Hs00199577_m1 |
| <i>Cntf</i>                          |             | Hs04194755_s1 |
| <i>Nt3</i>                           |             | Hs00267375_s1 |
| <i>Bdnf</i>                          |             | Hs02718934_s1 |
| <i>Vegfa</i>                         |             | Hs00900055_m1 |
| <i>nNos</i>                          |             | Hs00167223_m1 |
| <i>Mmp9</i>                          |             | Hs00957562_m1 |
| <i>Mmp14</i>                         |             | Hs01037003_g1 |
| <b>Software</b>                      |             |               |
| GraphPad Prism                       | GraphPad    |               |
| ImageJ                               | NIH         |               |
| ANSYS HFSS                           | ANSYS Corp. |               |

**Table S3. Key resource table.**

| Figure                      | Test                    | F-Value | Condition                             | P-value |
|-----------------------------|-------------------------|---------|---------------------------------------|---------|
| Figure 1c                   | ANOVA followed by Tukey | 28.45   | Control (0) vs. CNF:GO (1:1)          | <0.0001 |
| Figure 1e                   | ANOVA followed by Tukey | 7.374   | Glass vs. Stiff CGS                   | 0.8174  |
| Figure 1e                   | ANOVA followed by Tukey | 7.374   | Glass vs. Soft CGS                    | 0.0374  |
| Figure 1e                   | ANOVA followed by Tukey | 7.374   | Stiff CGS vs. Soft CGS                | 0.0146  |
| Figure 1f                   | ANOVA followed by Tukey | 202.4   | Glass vs. Stiff CGS                   | 0.0736  |
| Figure 1f                   | ANOVA followed by Tukey | 202.4   | Glass vs. Soft CGS                    | <0.0001 |
| Figure 1f                   | ANOVA followed by Tukey | 202.4   | Stiff CGS vs. Soft CGS                | <0.0001 |
| Figure 1h                   | ANOVA followed by Tukey | 33.36   | Glass vs. Stiff CGS                   | 0.4748  |
| Figure 1h                   | ANOVA followed by Tukey | 33.36   | Glass vs. Soft CGS                    | <0.0001 |
| Figure 1h                   | ANOVA followed by Tukey | 33.36   | Stiff CGS vs. Soft CGS                | 0.0003  |
| Figure 1i                   | ANOVA followed by Tukey | 21.76   | Glass vs. Stiff CGS                   | 0.9644  |
| Figure 1i                   | ANOVA followed by Tukey | 21.76   | Glass vs. Soft CGS                    | 0.0006  |
| Figure 1i                   | ANOVA followed by Tukey | 21.76   | Stiff CGS vs. Soft CGS                | 0.0009  |
| Figure 2c (TUJ1)            | ANOVA followed by Tukey | 33.32   | Glass vs. Soft CGS                    | 0.0054  |
| Figure 2c (TUJ1)            | ANOVA followed by Tukey | 33.32   | Glass vs. Soft CGS <sup>Stim</sup>    | <0.0001 |
| Figure 2c (TUJ1)            | ANOVA followed by Tukey | 33.32   | Soft CGS vs. Soft CGS <sup>Stim</sup> | 0.0091  |
| Figure 2c (MAP2)            | ANOVA followed by Tukey | 36.65   | Glass vs. Soft CGS                    | 0.047   |
| Figure 2c (MAP2)            | ANOVA followed by Tukey | 36.65   | Glass vs. Soft CGS <sup>Stim</sup>    | <0.0001 |
| Figure 2c (MAP2)            | ANOVA followed by Tukey | 36.65   | Soft CGS vs. Soft CGS <sup>Stim</sup> | 0.0008  |
| Figure 2e (TBR1)            | ANOVA followed by Tukey | 6.721   | Glass vs. Soft CGS                    | 0.9956  |
| Figure 2e (TBR1)            | ANOVA followed by Tukey | 6.721   | Glass vs. Soft CGS <sup>Stim</sup>    | 0.0257  |
| Figure 2e (TBR1)            | ANOVA followed by Tukey | 6.721   | Soft CGS vs. Soft CGS <sup>Stim</sup> | 0.0296  |
| Figure 2e (CTIP2)           | ANOVA followed by Tukey | 34.85   | Glass vs. Soft CGS                    | 0.0067  |
| Figure 2e (CTIP2)           | ANOVA followed by Tukey | 34.85   | Glass vs. Soft CGS <sup>Stim</sup>    | <0.0001 |
| Figure 2e (CTIP2)           | ANOVA followed by Tukey | 34.85   | Soft CGS vs. Soft CGS <sup>Stim</sup> | 0.0055  |
| Figure 2e (SATB2)           | ANOVA followed by Tukey | 8.452   | Glass vs. Soft CGS                    | 0.5269  |
| Figure 2e (SATB2)           | ANOVA followed by Tukey | 8.452   | Glass vs. Soft CGS <sup>Stim</sup>    | 0.008   |
| Figure 2e (SATB2)           | ANOVA followed by Tukey | 8.452   | Soft CGS vs. Soft CGS <sup>Stim</sup> | 0.0445  |
| Figure 2k                   | Unpaired t-test         | N/A     | Soft CGS vs. Soft CGS <sup>Stim</sup> | 0.0041  |
| Figure 2l                   | Unpaired t-test         | N/A     | Soft CGS vs. Soft CGS <sup>Stim</sup> | 0.0267  |
| Figure 3b ( <i>Nestin</i> ) | ANOVA followed by Tukey | 33.32   | Glass vs. Soft CGS                    | 0.0054  |
| Figure 3b ( <i>Nestin</i> ) | ANOVA followed by Tukey | 23.7    | Glass vs. Soft CGS <sup>Stim</sup>    | <0.0001 |
| Figure 3b ( <i>Nestin</i> ) | ANOVA followed by Tukey | 33.32   | Soft CGS vs. Soft CGS <sup>Stim</sup> | 0.0091  |
| Figure 3b ( <i>Tubb3</i> )  | ANOVA followed by Tukey | 23.7    | Glass vs. Soft CGS                    | 0.5282  |
| Figure 3b ( <i>Tubb3</i> )  | ANOVA followed by Tukey | 23.7    | Glass vs. Soft CGS <sup>Stim</sup>    | 0.0003  |
| Figure 3b ( <i>Tubb3</i> )  | ANOVA followed by Tukey | 23.7    | Soft CGS vs. Soft CGS <sup>Stim</sup> | 0.0012  |
| Figure 3b ( <i>Map2</i> )   | ANOVA followed by Tukey | 33.83   | Glass vs. Soft CGS                    | 0.4020  |
| Figure 3b ( <i>Map2</i> )   | ANOVA followed by Tukey | 33.83   | Glass vs. Soft CGS <sup>Stim</sup>    | <0.0001 |
| Figure 3b ( <i>Map2</i> )   | ANOVA followed by Tukey | 33.83   | Soft CGS vs. Soft CGS <sup>Stim</sup> | 0.0004  |
| Figure 3b ( <i>Syn1</i> )   | ANOVA followed by Tukey | 69.67   | Glass vs. Soft CGS                    | 0.0385  |
| Figure 3b ( <i>Syn1</i> )   | ANOVA followed by Tukey | 69.67   | Glass vs. Soft CGS <sup>Stim</sup>    | <0.0001 |
| Figure 3b ( <i>Syn1</i> )   | ANOVA followed by Tukey | 69.67   | Soft CGS vs. Soft CGS <sup>Stim</sup> | <0.0001 |
| Figure 3c ( <i>Cntf</i> )   | ANOVA followed by Tukey | 19.95   | Glass vs. Soft CGS                    | 0.9730  |
| Figure 3c ( <i>Cntf</i> )   | ANOVA followed by Tukey | 19.95   | Glass vs. Soft CGS <sup>Stim</sup>    | 0.0009  |
| Figure 3c ( <i>Cntf</i> )   | ANOVA followed by Tukey | 19.95   | Soft CGS vs. Soft CGS <sup>Stim</sup> | 0.0012  |
| Figure 3d                   | ANOVA followed by Tukey | 13.27   | Glass vs. Soft CGS                    | 0.4474  |
| Figure 3d                   | ANOVA followed by Tukey | 13.27   | Glass vs. Soft CGS <sup>Stim</sup>    | 0.0020  |
| Figure 3d                   | ANOVA followed by Tukey | 13.27   | Soft CGS vs. Soft CGS <sup>Stim</sup> | 0.0124  |
| Figure 4c ( <i>Nestin</i> ) | ANOVA followed by Tukey | 10.75   | Control vs. TV+CNTF                   | 0.0017  |
| Figure 4c ( <i>Tubb3</i> )  | ANOVA followed by Tukey | 3.95    | Control vs. CNTF                      | 0.0354  |
| Figure 4c ( <i>Tubb3</i> )  | ANOVA followed by Tukey | 3.95    | Control vs. TV+CNTF                   | 0.0434  |
| Figure 4c ( <i>Map2</i> )   | ANOVA followed by Tukey | 17.17   | Control vs. TV+CNTF                   | 0.0001  |
| Figure 4c ( <i>Map2</i> )   | ANOVA followed by Tukey | 17.17   | TV vs. TV+CNTF                        | 0.0009  |
| Figure 4c ( <i>Map2</i> )   | ANOVA followed by Tukey | 17.17   | CNTF vs. TV+CNTF                      | 0.0007  |
| Figure 4c ( <i>Syn1</i> )   | ANOVA followed by Tukey | 29.36   | Control vs. TV+CNTF                   | <0.0001 |
| Figure 4c ( <i>Syn1</i> )   | ANOVA followed by Tukey | 29.36   | TV vs. TV+CNTF                        | 0.0004  |
| Figure 4c ( <i>Syn1</i> )   | ANOVA followed by Tukey | 29.36   | CNTF vs. TV+CNTF                      | 0.0020  |
| Figure 4d (TUJ1)            | ANOVA followed by Tukey | 23.1    | Control vs. TV                        | 0.0009  |
| Figure 4d (TUJ1)            | ANOVA followed by Tukey | 23.1    | Control vs. CNTF                      | 0.0003  |
| Figure 4d (TUJ1)            | ANOVA followed by Tukey | 23.1    | Control vs. TV+CNTF                   | <0.0001 |
| Figure 4d (MAP2)            | ANOVA followed by Tukey | 30.71   | Control vs. TV                        | 0.0113  |



|                              |                         |       |                                                         |         |
|------------------------------|-------------------------|-------|---------------------------------------------------------|---------|
| Figure 4d (MAP2)             | ANOVA followed by Tukey | 30.71 | Control vs. CNTF                                        | 0.0002  |
| Figure 4d (MAP2)             | ANOVA followed by Tukey | 30.71 | Control vs. TV+CNTF                                     | <0.0001 |
| Figure 4d (MAP2)             | ANOVA followed by Tukey | 30.71 | TV vs. TV+CNTF                                          | 0.0008  |
| Figure 4f (TBR1)             | ANOVA followed by Tukey | 87.71 | Control vs. TV                                          | <0.0001 |
| Figure 4f (TBR1)             | ANOVA followed by Tukey | 87.71 | Control vs. CNTF                                        | <0.0001 |
| Figure 4f (TBR1)             | ANOVA followed by Tukey | 87.71 | Control vs. TV+CNTF                                     | <0.0001 |
| Figure 4f (CTIP2)            | ANOVA followed by Tukey | 105.7 | Control vs. TV                                          | <0.0001 |
| Figure 4f (CTIP2)            | ANOVA followed by Tukey | 105.7 | Control vs. CNTF                                        | <0.0001 |
| Figure 4f (CTIP2)            | ANOVA followed by Tukey | 105.7 | Control vs. TV+CNTF                                     | 0.0001  |
| Figure 4f (CTIP2)            | ANOVA followed by Tukey | 105.7 | TV vs. TV+CNTF                                          | <0.0001 |
| Figure 4h                    | ANOVA followed by Tukey | 2.382 | Control vs. TV+CNTF                                     | 0.0419  |
| Figure 5b                    | ANOVA followed by Tukey | 104.2 | Negative vs. Scramble <sup>KD+Stim</sup>                | <0.0001 |
| Figure 5b                    | ANOVA followed by Tukey | 104.2 | Scramble <sup>KD</sup> vs. Scramble <sup>KD+Stim</sup>  | <0.0001 |
| Figure 5b                    | ANOVA followed by Tukey | 104.2 | CNTF <sup>KD</sup> vs. Scramble <sup>KD+Stim</sup>      | <0.0001 |
| Figure 5b                    | ANOVA followed by Tukey | 104.2 | CNTF <sup>KD+Stim</sup> vs. Scramble <sup>KD+Stim</sup> | <0.0001 |
| Figure 5b                    | ANOVA followed by Tukey | 104.2 | CNTF <sup>KD</sup> vs. CNTF <sup>KD+Stim</sup>          | >0.9999 |
| Figure 5c                    | ANOVA followed by Tukey | 112   | Negative vs. Scramble <sup>KD+Stim</sup>                | <0.0001 |
| Figure 5c                    | ANOVA followed by Tukey | 112   | Scramble <sup>KD</sup> vs. Scramble <sup>KD+Stim</sup>  | <0.0001 |
| Figure 5c                    | ANOVA followed by Tukey | 112   | CNTF <sup>KD</sup> vs. Scramble <sup>KD+Stim</sup>      | <0.0001 |
| Figure 5c                    | ANOVA followed by Tukey | 112   | CNTF <sup>KD+Stim</sup> vs. Scramble <sup>KD+Stim</sup> | <0.0001 |
| Figure 5c                    | ANOVA followed by Tukey | 112   | CNTF <sup>KD</sup> vs. CNTF <sup>KD+Stim</sup>          | 0.993   |
| Figure 5e                    | ANOVA followed by Tukey | 19    | Scramble <sup>KD</sup> vs. Scramble <sup>KD+Stim</sup>  | 0.0008  |
| Figure 5e                    | ANOVA followed by Tukey | 19    | CNTF <sup>KD</sup> vs. Scramble <sup>KD+Stim</sup>      | <0.0001 |
| Figure 5e                    | ANOVA followed by Tukey | 19    | CNTF <sup>KD+Stim</sup> vs. Scramble <sup>KD+Stim</sup> | 0.0004  |
| Figure 5e                    | ANOVA followed by Tukey | 19    | CNTF <sup>KD</sup> vs. CNTF <sup>KD+Stim</sup>          | 0.7714  |
| Figure 5g                    | Unpaired t-test         | N/A   | Scramble <sup>KD+Stim</sup> vs. CNTF <sup>KD+Stim</sup> | 0.0323  |
| Figure S1a                   | ANOVA followed by Tukey | 228.4 | Glass vs. PS substrate                                  | >0.9999 |
| Figure S1a                   | ANOVA followed by Tukey | 228.4 | Glass vs. Stiff CGS                                     | <0.0001 |
| Figure S1a                   | ANOVA followed by Tukey | 228.4 | Glass vs. Soft CGS                                      | <0.0001 |
| Figure S1a                   | ANOVA followed by Tukey | 228.4 | PS substrate vs. Stiff CGS                              | <0.0001 |
| Figure S1a                   | ANOVA followed by Tukey | 228.4 | PS substrate vs. Soft CGS                               | <0.0001 |
| Figure S1k                   | ANOVA followed by Tukey | 23.15 | Glass vs. Soft CGS                                      | 0.0003  |
| Figure S1k                   | ANOVA followed by Tukey | 23.15 | Stiff CGS vs. Soft CGS                                  | 0.0015  |
| Figure S2f (TUJ1)            | ANOVA followed by Tukey | 15.66 | Glass vs. Stiff CGS <sup>Stim</sup>                     | 0.0017  |
| Figure S2f (TUJ1)            | ANOVA followed by Tukey | 15.66 | Stiff CGS vs. Stiff CGS <sup>Stim</sup>                 | 0.0036  |
| Figure S2f (MAP2)            | ANOVA followed by Tukey | 43.93 | Glass vs. Stiff CGS <sup>Stim</sup>                     | <0.0001 |
| Figure S2f (MAP2)            | ANOVA followed by Tukey | 43.93 | Stiff CGS vs. Stiff CGS <sup>Stim</sup>                 | <0.0001 |
| Figure S3a ( <i>Nestin</i> ) | ANOVA followed by Tukey | 10.19 | Glass vs. Stiff CGS <sup>Stim</sup>                     | 0.0345  |
| Figure S3a ( <i>Nestin</i> ) | ANOVA followed by Tukey | 10.19 | Stiff CGS vs. Stiff CGS <sup>Stim</sup>                 | 0.0043  |
| Figure S3a ( <i>Tubb3</i> )  | ANOVA followed by Tukey | 8.631 | Glass vs. Stiff CGS <sup>Stim</sup>                     | 0.05    |
| Figure S3a ( <i>Tubb3</i> )  | ANOVA followed by Tukey | 8.631 | Stiff CGS vs. Stiff CGS <sup>Stim</sup>                 | 0.007   |
| Figure S3a ( <i>Map2</i> )   | ANOVA followed by Tukey | 21.9  | Glass vs. Stiff CGS <sup>Stim</sup>                     | 0.0003  |
| Figure S3a ( <i>Map2</i> )   | ANOVA followed by Tukey | 21.9  | Stiff CGS vs. Stiff CGS <sup>Stim</sup>                 | 0.0114  |
| Figure S3a ( <i>Syn1</i> )   | ANOVA followed by Tukey | 7.753 | Soft CGS vs. Soft CGS <sup>Stim</sup>                   | 0.0091  |
| Figure S3b( <i>Cntf</i> )    | ANOVA followed by Tukey | 15.3  | Glass vs. Stiff CGS <sup>Stim</sup>                     | 0.0012  |
| Figure S3b ( <i>Cntf</i> )   | ANOVA followed by Tukey | 15.3  | Stiff CGS vs. Stiff CGS <sup>Stim</sup>                 | 0.0086  |
| Figure S3c (CNTF)            | ANOVA followed by Tukey | 12.3  | Glass vs. Stiff CGS                                     | 0.3648  |
| Figure S3c (CNTF)            | ANOVA followed by Tukey | 12.3  | Glass vs. Stiff CGS <sup>Stim</sup>                     | 0.0024  |
| Figure S3c (CNTF)            | ANOVA followed by Tukey | 12.3  | Stiff CGS vs. Stiff CGS <sup>Stim</sup>                 | 0.0196  |
| Figure S3f                   | ANOVA followed by Tukey | 12.77 | Glass vs. Soft CGS                                      | 0.0009  |
| Figure S3f                   | ANOVA followed by Tukey | 12.77 | Glass vs. Soft CGS <sup>Stim</sup>                      | 0.0005  |
| Figure S3f                   | ANOVA followed by Tukey | 12.77 | Stiff CGS vs. Soft CGS                                  | 0.0051  |
| Figure S3f                   | ANOVA followed by Tukey | 12.77 | Stiff CGS vs. Soft CGS <sup>Stim</sup>                  | 0.0028  |
| Figure S3f                   | ANOVA followed by Tukey | 12.77 | Stiff CGS <sup>Stim</sup> vs. Soft CGS                  | 0.0210  |
| Figure S3f                   | ANOVA followed by Tukey | 12.77 | Stiff CGS <sup>Stim</sup> vs. Soft CGS <sup>Stim</sup>  | 0.0114  |
| Figure S4b                   | ANOVA followed by Tukey | 11.83 | Negative vs. CNTF                                       | 0.0001  |
| Figure S4b                   | ANOVA followed by Tukey | 11.83 | VEGFA vs. CNTF                                          | 0.0005  |
| Figure S4b                   | ANOVA followed by Tukey | 11.83 | BDNF vs. CNTF                                           | 0.0044  |
| Figure S4b                   | ANOVA followed by Tukey | 11.83 | NT3 vs. CNTF                                            | 0.0020  |
| Figure S5b                   | ANOVA followed by Tukey | 103.3 | Control vs. Scramble <sup>KD</sup>                      | 0.9890  |
| Figure S5b                   | ANOVA followed by Tukey | 103.3 | Control vs. CNTF <sup>KD</sup>                          | <0.0001 |
| Figure S5b                   | ANOVA followed by Tukey | 103.3 | Scramble <sup>KD</sup> vs. CNTF <sup>KD</sup>           | <0.0001 |

**Table S4. Details of statistical analysis.**

## Figures

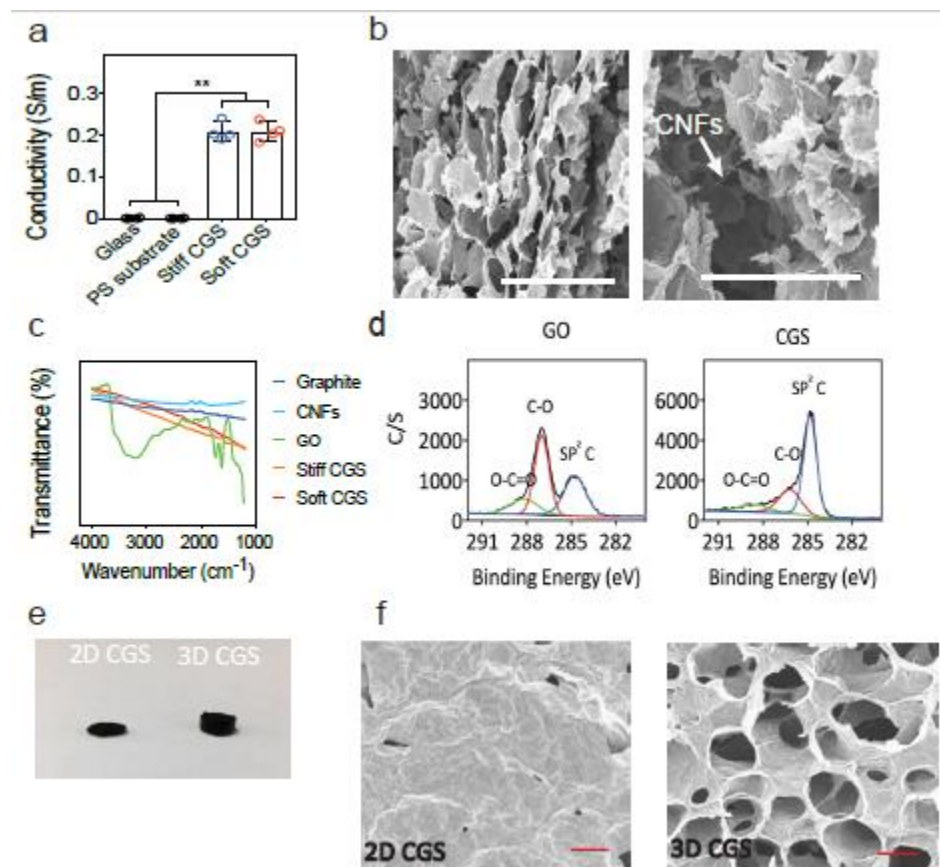

**Figure S1. Characterization of CGS.**

(a) Electrical conductivity of different substrates including glass, PS (polystyrene) substrate, Stiff CGS (~12 kPa), and Soft CGS (~3 kPa). (b) SEM images of CGS. Scale bars indicate 100 (Left) and 50  $\mu\text{m}$  (Right), respectively. (c) FTIR analysis of varying substrates including graphite, CNFs, GO, Stiff and Soft CGS after reducing GO by chemical reduction. FT-IR results showed that GO was fully reduced by reducing agents, forming CGS. In the presence of CNFs, CGS (Soft-CGS) showed negligible oxide groups, such as  $-\text{OH}$  ( $\sim 3200\text{ cm}^{-1}$ ) and  $-\text{COOH}$  ( $\sim 1700\text{ cm}^{-1}$ ). (d) XPS analysis of GO and CGS. XPS analysis also showed that GO contained oxides groups including C-O and O-C=O in histogram, whereas CGS did not have high C-O and O-C=O bands. Interestingly, CGS showed a high peak of the  $\text{sp}^2$  carbon band, indicating that during oxide reduction, rGO was intertwined with CNFs due to a hydrophobic interaction; eventually forming the CGS. (e) Photograph comparing 2D CGS and 3D CGS. (f) SEM images comparing 2D CGS versus 3D CGS surfaces. Scale bars 40  $\mu\text{m}$ .



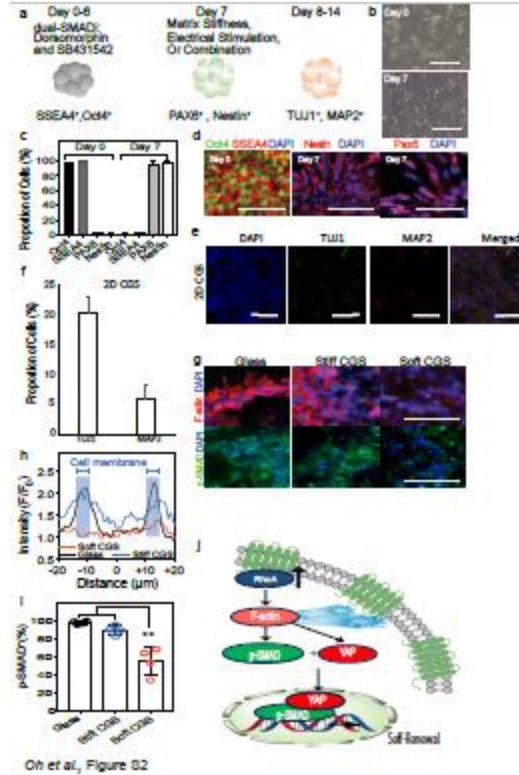

**Figure S2.** (a) Schematic illustration of cell culture procedure. (b) Contrast images of iPSCs at 0d and after 7d pre-treatment. Scale bars indicate 200  $\mu\text{m}$ . (c) Proportion of positive cells in cell culture for 0 d and 7 d. Most iPSC markers including Oct4 and SSEA4 disappeared over 7d culture, whereas neural progenitor markers such as Nestin and PAX6 become strongly expressed. Values represent the mean of independent experiments ( $n = 4$ ); error bars, S.D. (d) Representative images of iPSC cultures on 0d and 7d. Scale bars indicate 50  $\mu\text{m}$ . (e) Representative immunofluorescence analysis of TUJ1 (Green) /MAP2 (Red) in iPSCs cultured on 2D CGS. Cell nuclei were counterstained with DAPI (Blue). Scale bars indicate 50  $\mu\text{m}$ . (f) Bar plot showing the percentage of cells labeled with TUJ1<sup>+</sup> or MAP2<sup>+</sup> at 7 d on 2D CGS. Values represent the mean of independent experiments ( $n = 4$ ); error bars, S.D. (g) Representative immunofluorescence images indicating that Soft CGS promotes neuronal conversion by degrading polymerization of F-actin and exclusion of p-SMAD from the nucleus. Cells were stained with F-actin (Red) and p-SMAD (Green). Polymerization of F-actin in iPSCs on the CGSs of varying elasticity. Nuclei are shown in blue. Scale bars indicate 50  $\mu\text{m}$ . (h) Histogram showing profile of F-actin. Cells on glass and Stiff CGS ( $E=12$  kPa) exhibited more intense cytoplasmic F-actin staining than cells on Soft CGS ( $E=3$  kPa). (i) Bar plot showing rigidity-dependent subcellular localization of p-SMAD in iPSCs cultured for 2 d on different

substrates. Percentage of p-SMAD indicates that p-SMAD was co-localized with DAPI. **(i)** Analyzed using a one-way ANOVA, followed by Tukey's HSD *post hoc* test with \*\*  $P < 0.01$ . Values represent the mean of independent experiments ( $n = 4$ ); error bars, S.D. **(j)** Schematic diagram of YAP and p-SMAD localization into cell nucleus. The stiff substrates induce RhoA expression. In this cascade, F-actin expression is accelerated by RhoA, resulting in co-localization of YAP and p-SMAD. This co-localization in the cell nucleus subsequently induces transcription factors which are mainly utilized for self-renewal and preventing the cell differentiation process.

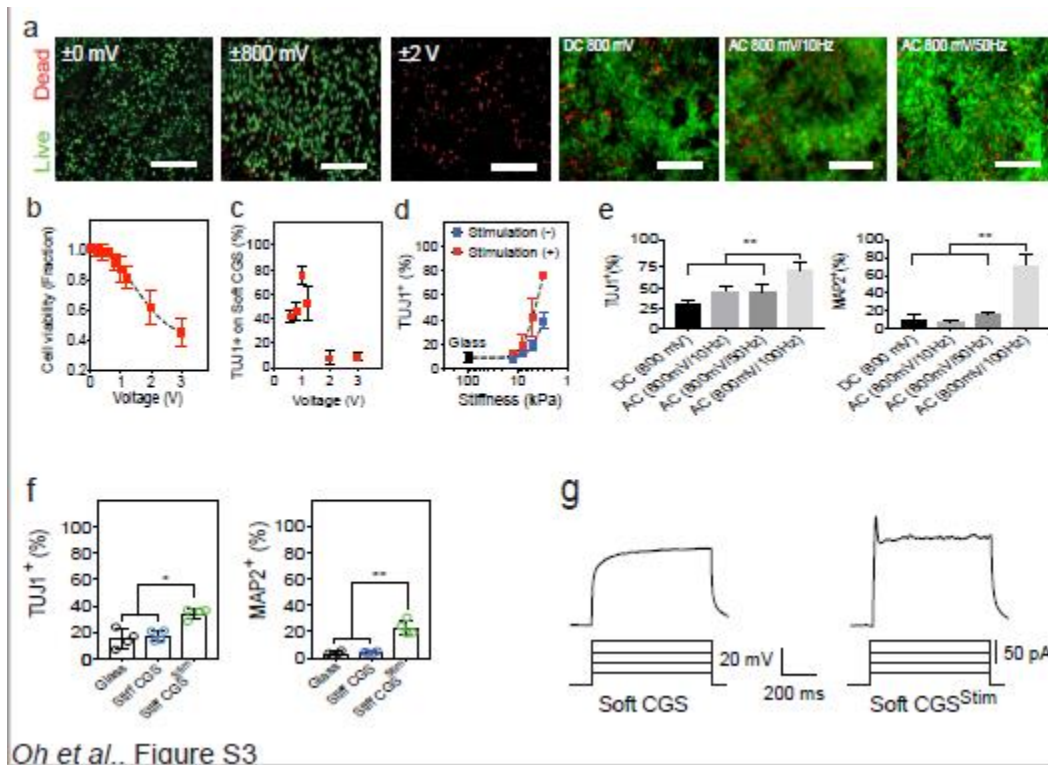

**Figure S3. Optimized electrical stimulation induces efficient neuronal conversion of iPSCs on CGS.**

**(a)** Cell viability analysis using Live/Dead staining. Frequency 100Hz unless otherwise noted in upper left hand corner. Stimulation for 1hr. Green (calcein AM) and red (ethidium homodimer-1) indicate viable and dead cells, respectively. Scale bar indicates 100  $\mu\text{m}$ . **(b)** Cell viability analysis across different applied voltages ranging from 0 to  $\pm 2$  V at 100Hz for 1 hr. **(c)** Proportion of Tuj1<sup>+</sup> cells on Soft CGS with varying voltages at 100Hz for 1 hr. **(d)** Proportion of Tuj1<sup>+</sup> cells with or without an exposure to the stimulation ( $\pm 800$  V/100 Hz for 1 hr) on different substrate stiffness. **(e)** TUJ1<sup>+</sup> and MAP2<sup>+</sup> at 7 d on CGSs of varying frequency patterns including

DC, AC 10Hz, and AC 50Hz. 800 mV was utilized to stimulate the cells. **(f)** Bar plots showing the electrical stimulation-induced increase in TUJ1 and MAP2 on Stiff CGS. Analyzed using a one-way ANOVA, followed by Tukey's HSD *post hoc* test with \* and \*\*  $P < 0.05$  and  $0.01$ . Values represent the mean of independent experiments ( $n = 4$ ); error bars, S.D. **(g)** The electrophysiological properties of iPSC-derived neurons after 7 days of culture demonstrated representative traces of membrane potential changes with step current injections in iPSC-derived neurons cultured 7 days on Soft CGS without (left) and with (right) one time electrical stimulation (Soft CGS<sup>Stim</sup>). A single spikelet was observed only in Soft CGS<sup>Stim</sup> condition. **(f)** Analyzed using a one-way ANOVA, followed by Tukey's HSD *post hoc* test with \* and \*\*  $P < 0.05$  and  $0.01$ . Values represent the mean of independent experiments ( $n = 4$ ); error bars, S.D.

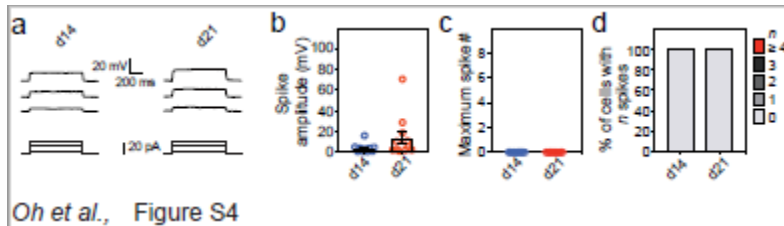

**Figure S4. Standard small molecule technique doesn't show efficient immunofluorescent and electrophysiological characterization of iPSC-derived neurons.**

**(a)** Representative membrane potentials upon step current injections of iPSC-derived cells cultured 14 d and 21 d on glass substrate with small molecule technique. **(b)** The summary results of averaged spike amplitude from iPSC-derived cells on 14 d and 21 d. **(c and d)** Maximum spike number and percentage of cells with indicated firing frequencies at 14 d and 21 d of differentiation on glass substrate with small molecule technique.

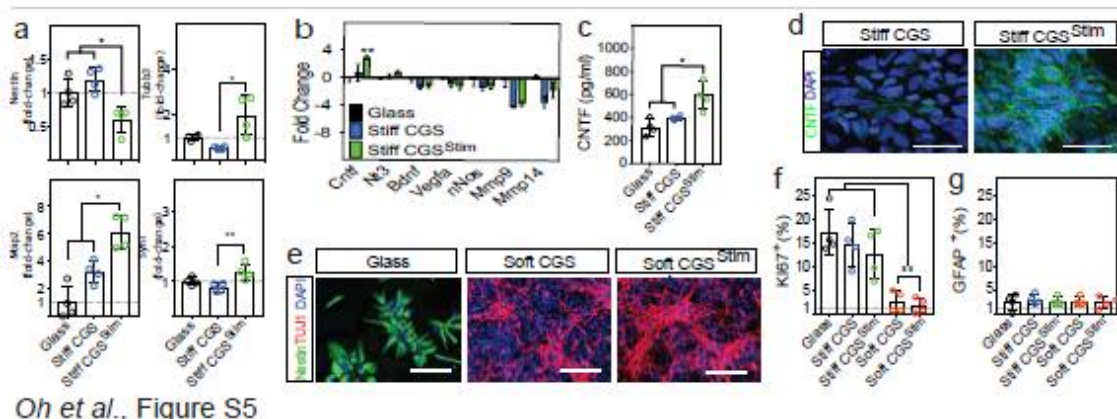

**Figure S5. Electrical stimulation augments CNTF production in iPSCs cultured on Stiff CGS.**

(a) qRT-PCR analysis of neuronal markers: *Nestin*, neuroectodermal stem cell marker; *Tubb3*, early neuronal marker; *Map2* and *Syn1*, matured-neuronal marker at 7 d on Glass, Stiff CGS, and Stiff CGS<sup>Stim</sup>. (b) The expression levels of neurotrophic factor genes at 1d after the electrical stimulation. Data are represented as Log<sub>2</sub> such that positive values indicate upregulation and negative values indicate downregulation relative to cells on glass substrate. (c) CNTF in the supernatants of samples with varying substrates, determined by sandwich ELISA. (d) Immunocytochemistry analysis for the CNTF (Green) on Stiff CGS and Stiff CGS<sup>Stim</sup>. Cell nuclei are counterstained with DAPI (Blue). Scale bars indicate 25 μm. (e) Immunocytochemistry analysis for early neuronal differentiation (TUJ1, Red) and neural progenitors (Nestin, Green). Scale bar indicates 200 μm. Cell nuclei were counterstained with DAPI (Blue). (f and g) Percentages of cell proliferation marker (f, Ki67) and glial cell (g, GFAP) at 7 d on CGSs with or without an exposure to the electrical stimulation. (a-c, f-g) Analyzed using a one-way ANOVA, followed by Tukey's HSD *post hoc* test with \* and \*\*  $P < 0.05$  and  $0.01$ . Values represent the mean of independent experiments ( $n = 4$ ); error bars, S.D.

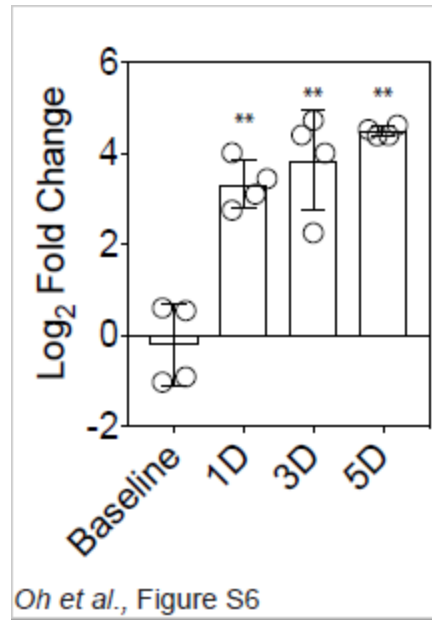

**Figure S6. Quantification of the CNTF transcription at 5 days after stimulation from the cells.** qRT-PCR analysis of CNTF for 5d on Soft CGS<sup>Stim</sup>. Analyzed using a one-way ANOVA, followed by Tukey's HSD *post hoc* test with \*\*  $P < 0.01$  compared to baseline. Values represent the mean of independent experiments ( $n = 4$ ); error bars, S.D.

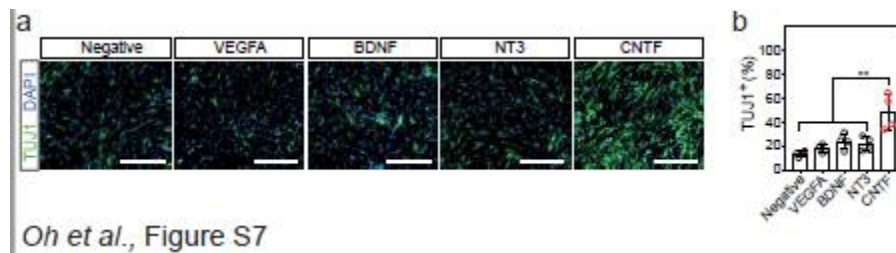

**Figure S7. An exposure to CNTF promotes neuronal differentiation of iPSCs on soft CGS.**

(a) Immunocytochemistry analysis for TUJ1 of iPSCs on Glass. After preconditioning first 7 d, cells were passaged on glass and cells were maintained with N2B27 media in the presence of various neurotrophic factors including VEGFA, BDNF, NT3, and CNTF (1 ng/ml). Cell nuclei were counterstained with DAPI (Blue). Scale bar indicates 200  $\mu\text{m}$ . (b) Quantification of TUJ1<sup>+</sup> at 14 d of differentiation. (b) Analyzed using a one-way ANOVA, followed by Tukey's HSD *post hoc* test with \*\*  $P < 0.01$ . Values represent the mean of independent experiments ( $n = 4$ ); error bars, S.D.



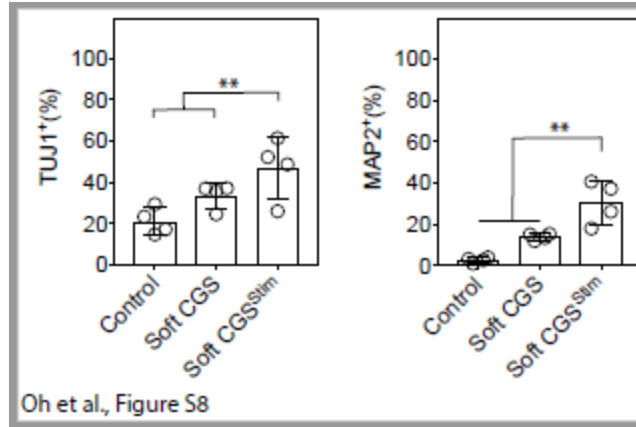

**Figure S8. Assessment of immature and more mature neuronal markers (TUJ1 and MAP2) to demonstrate that combination of mechanical and electrical cues promotes earlier conversion of the iPSC-derived neurons.** Bar plot showing the percentage of cells labeled with TUJ1<sup>+</sup> or MAP2<sup>+</sup> on CGS substrates. Analyzed using a one-way ANOVA, followed by Tukey's HSD *post hoc* test with \*\*  $P < 0.01$ . Values represent the mean of independent experiments ( $n = 4$ ); error bars, S.D.

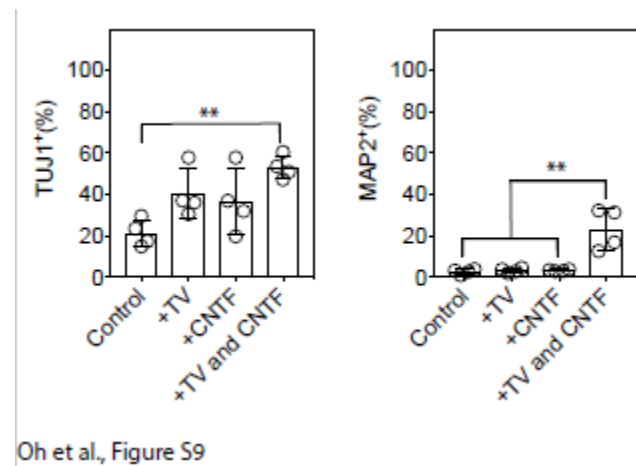

**Figure S9. Assessment of immature and more mature neuronal markers (TUJ1 and MAP2) to demonstrate that addition of TV and CNTF promotes earlier conversion of the iPSC-derived neurons.** Bar plot showing the percentage of cells labeled with TUJ1<sup>+</sup> or MAP2<sup>+</sup> with the addition of factors. Analyzed using a one-way ANOVA, followed by Tukey's HSD *post hoc* test with \*\*  $P < 0.01$ . Values represent the mean of independent experiments ( $n = 4$ ); error bars, S.D.

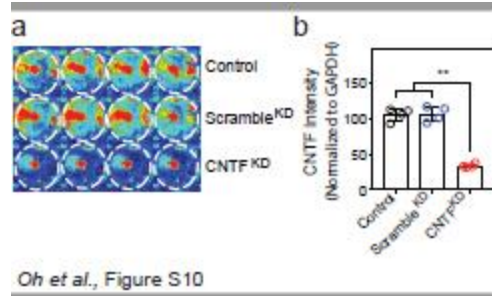

**Figure S10. CNTF expression was successfully down-regulated by CNTF shRNA.**

(a) Representative in-cell western images of human iPSCs in different treatment conditions such as media (Control), Scramble knock-down (Scramble<sup>KD</sup>), and CNTF knock-down (CNTF<sup>KD</sup>). (b) Quantification of in-cell western images per groups. CNTF intensity was normalized to GAPDH expression. (b) Analyzed using a one-way ANOVA, followed by Tukey's HSD *post hoc* test with \*\*  $P < 0.01$ . Values represent the mean of independent experiments ( $n = 4$ ); error bars, S.D.
